# Supplementary material for: A Machine Learning-Based Approximation of Strong Branching
Source: Atypon-hosted journal article supplement (doi:10.1287/ijoc.2016.0723), 2017-01-01
Supplement: ijoc.2016.0723-sm.pdf [file ijoc.2016.0723-sm.pdf]

Authors are encouraged to submit new papers to INFORMS journals by means of a style file template, which includes the journal title. However, use of a template does not certify that the paper has been accepted for publication in the named journal. INFORMS journal templates are for the exclusive purpose of submitting to an INFORMS journal and should not be used to distribute the papers in print or online or to submit the papers to another publication.

# A Machine Learning-Based Approximation of Strong Branching Supplemental material

Alejandro Marcos Alvarez, Quentin Louveaux, Louis Wehenkel  
Université de Liège, Department of EE&CS,  
Sart-Tilman B28, Liège, Belgium, {amarcos,q.louveaux,l.wehenkel}@ulg.ac.be

---

These appendices constitute the supplemental material of the paper entitled *A Machine Learning-Based Approximation of Strong Branching* made available to the reader.

## Appendix A: About ExtraTrees parameters

As mentioned in Section 3.2 of the main document, the performances of the ExtraTrees are very robust with respect to the choice of their parameters. The ExtraTrees actually have three parameters:  $N$ , which is the number of trees in the method,  $k$ , which is the number of features evaluated at each node during the creation of the trees, and  $n_{\min}$ , which is the number of learning samples contained in a node below which that node becomes a leaf. The number of trees is set to the default value of  $N = 100$  in our experiments. The parameter  $k$ , which represents the number of features that are considered for the creation of the next node in the ExtraTrees, is also set to a default value of  $k = |\phi|$ . The exact understanding of these parameters is beyond the scope of this appendix, and we refer the reader to (Geurts et al. 2006) for a deeper explanation.

Tables 1, 2, 3 and 4 compare the influence of the parameter  $n_{\min}$  on the performance of the method. The experiments are the same as those shown in Section 5.3 of the main document. The main observation that can be made from those tables is that the parameter  $n_{\min}$  influences the computational time, but not the accuracy of the taken decisions. Indeed, the greater the  $n_{\min}$ , the faster the method. This behavior was expected, as a large  $n_{\min}$  produces smaller trees, generally yielding a reduced computational time required to take a branching decision. On the other hand, the third column of the tables 1 and 4, and the sixth column of the table 2, all of which correspond to the gap closed after the node limit has been reached, show that

**Table 1** Results for the problems of BPEQ\_test, BPSC\_test and MKNSC\_test.

|                           | Node limit ( $10^5$ nodes) |         |          | Time limit (10 min.) |         |         |
|---------------------------|----------------------------|---------|----------|----------------------|---------|---------|
|                           | S/T                        | Cl. Gap | Time (s) | S/T                  | Cl. Gap | Nodes   |
| Learned - $n_{\min} = 1$  | 0/150                      | 0.62    | 72.23    | 16/150               | 0.81    | 104,090 |
| Learned - $n_{\min} = 5$  | 0/150                      | 0.62    | 63.28    | 19/150               | 0.82    | 114,389 |
| Learned - $n_{\min} = 10$ | 0/150                      | 0.62    | 61.91    | 21/150               | 0.83    | 122,038 |
| Learned - $n_{\min} = 20$ | 0/150                      | 0.62    | 54.23    | 23/150               | 0.84    | 131,994 |

**Table 2** Results for the MIPLIB problems. Node limit =  $10^5$  nodes.

|                           | Solved by all methods |       |          | Not solved by at least one method |         |       |          |
|---------------------------|-----------------------|-------|----------|-----------------------------------|---------|-------|----------|
|                           | S/T                   | Nodes | Time (s) | S/T                               | Cl. Gap | Nodes | Time (s) |
| Learned - $n_{\min} = 1$  | 9/44                  | 1,436 | 3.42     | 11/44                             | 0.63    | 8,084 | 110.70   |
| Learned - $n_{\min} = 5$  | 9/44                  | 1,229 | 3.25     | 10/44                             | 0.62    | 8,176 | 103.34   |
| Learned - $n_{\min} = 10$ | 9/44                  | 1,437 | 5.45     | 10/44                             | 0.63    | 8,083 | 84.75    |
| Learned - $n_{\min} = 20$ | 9/44                  | 1,194 | 2.73     | 10/44                             | 0.62    | 8,073 | 162.87   |

**Table 3** Results for the MIPLIB problems. Time limit = 10 min.

|                           | Solved by all methods |        |          | Not solved by at least one method |         |         |          |
|---------------------------|-----------------------|--------|----------|-----------------------------------|---------|---------|----------|
|                           | S/T                   | Nodes  | Time (s) | S/T                               | Cl. Gap | Nodes   | Time (s) |
| Learned - $n_{\min} = 1$  | 19/44                 | 13,887 | 36.19    | 5/44                              | 0.64    | 112,810 | 510.72   |
| Learned - $n_{\min} = 5$  | 19/44                 | 15,310 | 38.46    | 5/44                              | 0.64    | 116,493 | 525.46   |
| Learned - $n_{\min} = 10$ | 19/44                 | 14,647 | 37.42    | 7/44                              | 0.65    | 124,346 | 499.55   |
| Learned - $n_{\min} = 20$ | 19/44                 | 14,008 | 34.12    | 5/44                              | 0.63    | 130,081 | 512.72   |

**Table 4** Results for the problems from BPSC\_test. Comparison between the strategy learned on the entire dataset and the strategy learned only from BPSC\_train examples.

|                                       | Node limit ( $10^5$ nodes) |         |          | Time limit (10 min.) |         |         |
|---------------------------------------|----------------------------|---------|----------|----------------------|---------|---------|
|                                       | S/T                        | Cl. Gap | Time (s) | S/T                  | Cl. Gap | Nodes   |
| Learned - $n_{\min} = 1$              | 0/50                       | 0.47    | 76.20    | 0/50                 | 0.63    | 83,938  |
| Learned - $n_{\min} = 5$              | 0/50                       | 0.47    | 67.31    | 0/50                 | 0.64    | 94,826  |
| Learned - $n_{\min} = 10$             | 0/50                       | 0.47    | 68.58    | 0/50                 | 0.65    | 102,941 |
| Learned - $n_{\min} = 20$             | 0/50                       | 0.48    | 56.36    | 0/50                 | 0.67    | 112,918 |
| Learned - $n_{\min} = 1$ - BPSC only  | 0/50                       | 0.51    | 90.69    | 0/50                 | 0.67    | 77,174  |
| Learned - $n_{\min} = 5$ - BPSC only  | 0/50                       | 0.51    | 79.53    | 0/50                 | 0.67    | 82,535  |
| Learned - $n_{\min} = 10$ - BPSC only | 0/50                       | 0.51    | 72.79    | 0/50                 | 0.68    | 92,586  |
| Learned - $n_{\min} = 20$ - BPSC only | 0/50                       | 0.51    | 60.54    | 0/50                 | 0.70    | 109,066 |

the accuracy of the taken decision is not influenced by  $n_{\min}$  in the range of tested values. These observations illustrate that the method is actually robust to the choice of  $n_{\min}$ .

Besides the experiments included in this appendix, further work should focus on a more detailed study of the influence of the different parameters of the ExtraTrees on the performance of the optimization procedure.

**Table 5** List of problems from MIPLIB3 and MIPLIB2003.

|         |          |           |        |          |         |         |         |
|---------|----------|-----------|--------|----------|---------|---------|---------|
| 10teams | aflow30a | aflow40b  | air03  | air04    | air05   | cap6000 | dcmulti |
| egout   | fiber    | fixnet6   | harp2  | khb05250 | l152lav | lseu    | mas74   |
| mas76   | misc03   | misc06    | misc07 | mitre    | mod008  | mod010  | mod011  |
| modglob | nw04     | opt1217   | p0033  | p0201    | p0282   | p0548   | p2756   |
| pk1     | pp08a    | pp08aCUTS | qiu    | rentacar | rgn     | set1ch  | stein27 |
| stein45 | tr12-30  | vpm1      | vpm2   |          |         |         |         |

**Table 6** Updated list of problems from MIPLIB3 and MIPLIB2003. This list contains the problems from Table 5 that are solved to optimality with each branching heuristic in less than five days.

|          |          |         |         |           |         |
|----------|----------|---------|---------|-----------|---------|
| aflow30a | air03    | air04   | air05   | cap6000   | dcmulti |
| egout    | khb05250 | l152lav | lseu    | mas76     | misc03  |
| misc06   | misc07   | mitre   | mod008  | mod010    | mod011  |
| nw04     | p0033    | p0201   | pk1     | pp08aCUTS | qiu     |
| rentacar | rgn      | stein27 | stein45 | vpm1      | vpm2    |

## Appendix B: Detailed experimental results

This appendix contains the detailed experimental results for the MIPLIB problems used in our experiments. Averaging the following results over all problems gives the aggregated results shown in the main paper. The detailed results are given in Tables 7 through 20.

The first set of tables, i.e., Tables 7 through 14, reports the results for the MIPLIB problems contained in Table 5 when limits are set either on the number of nodes or on the time spent. The B&B version that is used for these experiments is pure, i.e., no cuts nor heuristics are used.

The second set of tables, i.e., Tables 15 through 20, reports the optimization results for the problems contained in Table 6. These problems are obtained by keeping from the initial list the problems that are solved within a 5 days time limit with all considered branching strategies. Tables 15 through 20 then report the optimization results with no time (or node) limit on the second list of MIPLIB problems. Additionally, the second half of these tables contain the results when CPLEX’s cuts and heuristics are used in the course of the optimization. The first half still corresponds to the pure version of B&B.

**Table 7 Detailed results for the MIPLIB problems (1/4). Node limit =  $10^5$  nodes.**

| Problem names |         | 10teams  | aflow30a | aflow40b | air03   | air04     | air05     | cap6000    | dcmulti | egout  | fiber   | fixnet6  |
|---------------|---------|----------|----------|----------|---------|-----------|-----------|------------|---------|--------|---------|----------|
| LP Obj.       |         | 917      | 983.17   | 1,005.66 | 338,864 | 55,535.40 | 25,877.60 | -2,450,000 | 183,976 | 149.59 | 156,083 | 1,200.88 |
| True Obj.     |         | 924      | 1,158    | 1,170    | 340,160 | 56,100    | 26,374    | -2,450,000 | 188,182 | 568.10 | 405,935 | 3,983    |
| Fin. by all   |         | 0        | 0        | 0        | 1       | 0         | 0         | 0          | 0       | 0      | 0       | 0        |
| Method        |         |          |          |          |         |           |           |            |         |        |         |          |
| Random        | Fin.    | 4        | 5        | 5        | 0       | 4         | 4         | 5          | 5       | 4      | 5       | 5        |
|               | Obj.    | 917      | 1,051.18 | 1,043.31 | 340,160 | 55,946.50 | 26,234.50 | -2,450,000 | 187,298 | 562.60 | 189,746 | 1,573.11 |
|               | Nodes   | 10,000   | 10,000   | 10,000   | 25      | 10,000    | 10,000    | 10,000     | 10,000  | 10,000 | 10,000  | 10,000   |
|               | Time    | 364.40   | 9.35     | 44.47    | 1.45    | 2,219.56  | 1,173.48  | 30.70      | 5.61    | 1.12   | 5.39    | 4        |
|               | Cl. Gap | 0        | 0.39     | 0.23     | 1       | 0.68      | 0.72      | 0.41       | 0.79    | 0.99   | 0.13    | 0.13     |
| MIB           | Fin.    | 4        | 5        | 5        | 0       | 4         | 5         | 5          | 0       | 0      | 5       | 5        |
|               | Obj.    | 920      | 1,059.97 | 1,038.70 | 340,160 | 55,980.80 | 26,270.30 | -2,450,000 | 188,182 | 568.10 | 184,391 | 2,004.30 |
|               | Nodes   | 10,000   | 10,000   | 10,000   | 7       | 10,000    | 10,000    | 10,000     | 9,493   | 7,015  | 10,000  | 10,000   |
|               | Time    | 251.55   | 10.44    | 46.41    | 0.60    | 5,965.28  | 1,516.76  | 29.02      | 4.44    | 0.79   | 5.91    | 4.12     |
|               | Cl. Gap | 0.43     | 0.44     | 0.20     | 1       | 0.74      | 0.79      | 0.41       | 1       | 1      | 0.11    | 0.29     |
| NCB           | Fin.    | 0        | 5        | 5        | 0       | 0         | 0         | 5          | 0       | 0      | 5       | 5        |
|               | Obj.    | 924      | 1,117.99 | 1,099.12 | 340,160 | 56,137    | 26,374    | -2,450,000 | 188,182 | 568.10 | 359,328 | 2,528.38 |
|               | Nodes   | 1,453    | 10,000   | 10,000   | 3       | 131       | 215       | 10,000     | 1,065   | 5,713  | 10,000  | 10,000   |
|               | Time    | 456.18   | 98.16    | 354.31   | 2.04    | 1,146.13  | 772.90    | 147.50     | 2.99    | 1.94   | 52.82   | 74.06    |
|               | Cl. Gap | 1        | 0.77     | 0.58     | 1       | 1         | 1         | 0.44       | 1       | 1      | 0.81    | 0.48     |
| FSB           | Fin.    | 0        | 5        | 5        | 0       | 0         | 0         | 5          | 0       | 0      | 5       | 5        |
|               | Obj.    | 924      | 1,120.14 | 1,099.87 | 340,160 | 56,137    | 26,400    | -2,450,000 | 188,182 | 568    | 362,329 | 2,482.51 |
|               | Nodes   | 259      | 10,000   | 10,000   | 3       | 111       | 177       | 10,000     | 927     | 4,730  | 10,000  | 10,000   |
|               | Time    | 1,215.41 | 217.34   | 979.50   | 2.75    | 3,249.42  | 3,840     | 159        | 4.83    | 2.16   | 267.72  | 246.11   |
|               | Cl. Gap | 1        | 0.78     | 0.58     | 1       | 1         | 1         | 0.44       | 1       | 1      | 0.83    | 0.46     |
| RB            | Fin.    | 5        | 5        | 5        | 0       | 0         | 0         | 5          | 0       | 0      | 5       | 5        |
|               | Obj.    | 917      | 1,103.69 | 1,089.99 | 340,160 | 56,137    | 26,374    | -2,450,000 | 188,182 | 568.10 | 287,517 | 2,322.90 |
|               | Nodes   | 10,000   | 10,000   | 10,000   | 3       | 3,601     | 1,489     | 10,000     | 1,013   | 9,143  | 10,000  | 10,000   |
|               | Time    | 1,200.43 | 37.74    | 136.16   | 0.53    | 2,786.84  | 1,461.74  | 118        | 1.79    | 2.37   | 18.77   | 18.36    |
|               | Cl. Gap | 0        | 0.69     | 0.52     | 1       | 1         | 1         | 0.44       | 1       | 1      | 0.53    | 0.40     |
| Learned       | Fin.    | 0        | 5        | 5        | 0       | 0         | 4         | 5          | 0       | 0      | 5       | 5        |
|               | Obj.    | 924      | 1,064.88 | 1,039.41 | 340,160 | 56,137    | 26,284.40 | -2,450,000 | 188,182 | 568.10 | 313,565 | 2,239.68 |
|               | Nodes   | 1,739    | 10,000   | 10,000   | 3       | 3,833     | 10,000    | 10,000     | 1,565   | 3,007  | 10,000  | 10,000   |
|               | Time    | 108.16   | 57.10    | 146.12   | 0.48    | 1,648.75  | 2,237.31  | 45.80      | 2.76    | 1.31   | 42.17   | 61.90    |
|               | Cl. Gap | 1        | 0.47     | 0.21     | 1       | 1         | 1         | 0.82       | 1       | 1      | 0.63    | 0.37     |

The row 'Cl. Gap' refers to the gap closed at the end of the optimization whether it achieved optimality or not. The row 'Fin. by all' indicates whether all methods were able to solve this problem to optimality. For each method, the 'Fin.' rows indicate the termination status of the optimization: 0 for optimality, 1 for unfeasibility, 2 for unboundedness, 3 for unfeasibility or unboundedness, 4 for another stopping criterion with a feasible solution found, and 5 for another stopping criterion with no feasible solution found.

**Table 8 Detailed results for the MIPLIB problems (2/4). Node limit =  $10^5$  nodes.**

| Problem names |         | harp2       | khb05250    | 1152lav  | lseu     | mas74     | mas76     | misc03 | misc06    | misc07   | mitre   | mod008 |
|---------------|---------|-------------|-------------|----------|----------|-----------|-----------|--------|-----------|----------|---------|--------|
| LP Obj.       |         | -74,300,000 | 95,900,000  | 4,656.36 | 834.68   | 10,482.80 | 38,893.90 | 1,910  | 12,841.70 | 1,415    | 114,741 | 290.93 |
| True Obj.     |         | -73,900,000 | 107,000,000 | 4,722    | 1,120    | 11,801.20 | 40,005.10 | 3,360  | 12,850.90 | 2,810    | 115,155 | 307    |
| Fin. by all   |         | 0           | 0           | 0        | 0        | 0         | 0         | 1      | 1         | 0        | 0       | 0      |
| Method        |         |             |             |          |          |           |           |        |           |          |         |        |
| Random        | Fin.    | 5           | 4           | 4        | 5        | 5         | 5         | 0      | 0         | 4        | 5       | 4      |
|               | Obj.    | -74,300,000 | 107,000,000 | 4,700.21 | 1,005.77 | 10,860.40 | 39,280.80 | 3,360  | 12,851.10 | 2,294.29 | 115,094 | 305.69 |
|               | Nodes   | 10,000      | 10,000      | 10,000   | 10,000   | 10,000    | 10,000    | 1,179  | 527       | 10,000   | 10,000  | 10,000 |
|               | Time    | 16.92       | 6.17        | 32.30    | 1.10     | 3.37      | 3.04      | 0.51   | 0.69      | 10.44    | 182.61  | 1.50   |
|               | Cl. Gap | 0.16        | 0.98        | 0.67     | 0.60     | 0.29      | 0.35      | 1      | 1.02      | 0.63     | 0.85    | 0.92   |
| MIB           | Fin.    | 5           | 0           | 4        | 5        | 5         | 5         | 0      | 0         | 4        | 0       | 0      |
|               | Obj.    | -74,300,000 | 107,000,000 | 4,705.10 | 1,062.44 | 10,877    | 39,301.10 | 3,360  | 12,850.90 | 2,574.11 | 115,155 | 307    |
|               | Nodes   | 10,000      | 7,477       | 10,000   | 10,000   | 10,000    | 10,000    | 629    | 551       | 10,000   | 986     | 9,091  |
|               | Time    | 15.67       | 4.95        | 35.04    | 1.11     | 3.42      | 3.08      | 0.32   | 0.76      | 9        | 30.06   | 1.49   |
|               | Cl. Gap | 0.14        | 1           | 0.74     | 0.80     | 0.30      | 0.37      | 1      | 1         | 0.83     | 1       | 1      |
| NCB           | Fin.    | 5           | 0           | 0        | 4        | 5         | 5         | 0      | 0         | 4        | 0       | 0      |
|               | Obj.    | -74,100,000 | 107,000,000 | 4,722    | 1,093.29 | 11,041.20 | 39,371.80 | 3,360  | 12,850.90 | 2,487.50 | 115,155 | 307    |
|               | Nodes   | 10,000      | 1,527       | 213      | 10,000   | 10,000    | 10,000    | 579    | 56        | 10,000   | 617     | 4,605  |
|               | Time    | 95.59       | 4.76        | 4.53     | 5.16     | 28.23     | 23.72     | 2.65   | 0.58      | 152.62   | 49.18   | 2.85   |
|               | Cl. Gap | 0.63        | 1           | 1        | 0.91     | 0.42      | 0.43      | 1      | 1         | 0.77     | 1       | 1      |
| FSB           | Fin.    | 5           | 0           | 0        | 5        | 5         | 5         | 0      | 0         | 4        | 0       | 0      |
|               | Obj.    | -74,100,000 | 107,000,000 | 4,722    | 1,088.06 | 11,041.80 | 39,410.90 | 3,360  | 12,850.90 | 2,537.50 | 115,000 | 307    |
|               | Nodes   | 10,000      | 1,502       | 238      | 10,000   | 10,000    | 10,000    | 371    | 55        | 10,000   | 709     | 3,333  |
|               | Time    | 336         | 7.27        | 47.67    | 8.37     | 44.55     | 35.20     | 2.78   | 1.20      | 378.26   | 139     | 1.77   |
|               | Cl. Gap | 0.65        | 1           | 1        | 0.89     | 0.42      | 0.47      | 1      | 1         | 0.80     | 1       | 1      |
| RB            | Fin.    | 5           | 0           | 0        | 4        | 5         | 5         | 0      | 0         | 4        | 0       | 0      |
|               | Obj.    | -74,100,000 | 107,000,000 | 4,722    | 1,095.03 | 11,008    | 39,368    | 3,360  | 12,850.90 | 2,668.33 | 115,155 | 307    |
|               | Nodes   | 10,000      | 1,685       | 611      | 10,000   | 10,000    | 10,000    | 641    | 62        | 10,000   | 1,900   | 2,927  |
|               | Time    | 43.14       | 2.21        | 6.71     | 2.68     | 9.43      | 8.12      | 1.89   | 0.54      | 48.44    | 130.35  | 1.24   |
|               | Cl. Gap | 0.56        | 1           | 1        | 0.91     | 0.40      | 0.43      | 1      | 1         | 0.90     | 1       | 1      |
| Learned       | Fin.    | 5           | 0           | 0        | 4        | 5         | 5         | 0      | 0         | 5        | 0       | 0      |
|               | Obj.    | -74,100,000 | 107,000,000 | 4,722    | 1,083.23 | 10,914.30 | 39,321    | 3,360  | 12,850.90 | 2,410    | 115,155 | 307    |
|               | Nodes   | 10,000      | 5,790       | 1,061    | 10,000   | 10,000    | 10,000    | 1,865  | 161       | 10,000   | 470     | 6,365  |
|               | Time    | 59.84       | 8.29        | 8.77     | 6.90     | 21.87     | 16.38     | 2.29   | 0.53      | 35.01    | 26.31   | 3.81   |
|               | Cl. Gap | 0.41        | 1           | 1        | 0.87     | 0.33      | 0.38      | 1      | 1         | 0.71     | 1       | 1      |

The row ‘Cl. Gap’ refers to the gap closed at the end of the optimization whether it achieved optimality or not. The row ‘Fin. by all’ indicates whether all methods were able to solve this problem to optimality. For each method, the ‘Fin.’ rows indicate the termination status of the optimization: 0 for optimality, 1 for unfeasibility, 2 for unboundedness, 3 for unfeasibility or unboundedness, 4 for another stopping criterion with a feasible solution found, and 5 for another stopping criterion with no feasible solution found.

Table 9 Detailed results for the MIPLIB problems (3/4). Node limit =  $10^5$  nodes.

| Problem names |         | mod010   | mod011      | modglob    | nw04      | opt1217 | p0033    | p0201 | p0282   | p0548    | p2756    | pk1    |
|---------------|---------|----------|-------------|------------|-----------|---------|----------|-------|---------|----------|----------|--------|
| LP Obj.       |         | 6,532.08 | -62,100,000 | 20,400,000 | 16,310.70 | -20.02  | 2,520.57 | 6,875 | 176,868 | 429.68   | 2,698.95 | 0      |
| True Obj.     |         | 6,548    | -54,600,000 | 20,700,000 | 16,862    | -16     | 3,089    | 7,615 | 258,411 | 8,691    | 3,124    | 11     |
| Fin. by all   |         | 0        | 0           | 0          | 1         | 0       | 1        | 1     | 0       | 0        | 0        | 0      |
| Method        |         |          |             |            |           |         |          |       |         |          |          |        |
| Random        | Fin.    | 4        | 5           | 5          | 0         | 5       | 0        | 0     | 5       | 5        | 5        | 5      |
|               | Obj.    | 6,543    | -57,400,000 | 20,500,000 | 16,862    | -20.02  | 3,089    | 7,615 | 184,159 | 1,422.30 | 2,713.04 | 2.38   |
|               | Nodes   | 10,000   | 10,000      | 10,000     | 259       | 10,000  | 4,859    | 649   | 10,000  | 10,000   | 10,000   | 10,000 |
|               | Time    | 21.46    | 67.20       | 3.31       | 10.80     | 6.83    | 0.31     | 0.45  | 2.36    | 4.10     | 12.33    | 2.72   |
|               | Cl. Gap | 0.69     | 0.62        | 0.33       | 1         | 0       | 1        | 1     | 0.09    | 0.12     | 0.03     | 0.22   |
| MIB           | Fin.    | 0        | 5           | 5          | 0         | 5       | 0        | 0     | 5       | 5        | 5        | 5      |
|               | Obj.    | 6,548    | -55,700,000 | 20,600,000 | 16,862    | -20.02  | 3,089    | 7,615 | 181,564 | 512.38   | 2,702.63 | 3.05   |
|               | Nodes   | 532      | 10,000      | 10,000     | 1,737     | 10,000  | 6,265    | 4,747 | 10,000  | 10,000   | 10,000   | 10,000 |
|               | Time    | 3.74     | 77.08       | 3.34       | 45.13     | 6.82    | 0.35     | 2.37  | 2.56    | 3.16     | 9.92     | 2.66   |
|               | Cl. Gap | 1        | 0.84        | 0.57       | 1         | 0       | 1        | 1     | 0.06    | 0.01     | 0.01     | 0.28   |
| NCB           | Fin.    | 0        | 5           | 5          | 0         | 5       | 0        | 0     | 0       | 5        | 5        | 5      |
|               | Obj.    | 6,548    | -55,000,000 | 20,600,000 | 16,862    | -19.80  | 3,089    | 7,615 | 258,411 | 8,678.53 | 2,925.78 | 4.79   |
|               | Nodes   | 96       | 10,000      | 10,000     | 355       | 10,000  | 745      | 173   | 624     | 10,000   | 10,000   | 10,000 |
|               | Time    | 2.47     | 2,764.36    | 24.84      | 62.49     | 17      | 0.10     | 1.16  | 1.12    | 24.01    | 142.83   | 33.08  |
|               | Cl. Gap | 1        | 0.94        | 0.66       | 1         | 0.06    | 1        | 1     | 1       | 1        | 0.53     | 0.44   |
| FSB           | Fin.    | 0        | 5           | 5          | 0         | 5       | 0        | 0     | 0       | 0        | 5        | 5      |
|               | Obj.    | 6,548    | -55,000,000 | 20,600,000 | 16,862    | -19.77  | 3,089    | 7,615 | 258,411 | 8,690    | 2,942.55 | 4.54   |
|               | Nodes   | 31       | 10,000      | 10,000     | 233       | 10,000  | 363      | 186   | 502     | 8,920    | 10,000   | 10,000 |
|               | Time    | 3.33     | 3,815.40    | 63.53      | 82.35     | 150.78  | 0.07     | 3.71  | 1.29    | 24.80    | 483.98   | 53.50  |
|               | Cl. Gap | 1        | 0.94        | 0.70       | 1         | 0.06    | 1        | 1     | 1       | 1        | 0.57     | 0.41   |
| RB            | Fin.    | 0        | 5           | 5          | 0         | 5       | 0        | 0     | 0       | 5        | 5        | 5      |
|               | Obj.    | 6,548    | -55,300,000 | 20,600,000 | 16,862    | -19.92  | 3,089    | 7,615 | 258,411 | 4,881.29 | 2,715.33 | 4.07   |
|               | Nodes   | 83       | 10,000      | 10,000     | 1,201     | 10,000  | 1,150    | 359   | 767     | 10,000   | 10,000   | 10,000 |
|               | Time    | 3.26     | 991.97      | 9.07       | 116.97    | 16.27   | 0.15     | 1.51  | 0.97    | 20.97    | 64.81    | 9.59   |
|               | Cl. Gap | 1        | 0.90        | 0.58       | 1         | 0.03    | 1        | 1     | 1       | 0.54     | 0.04     | 0.37   |
| Learned       | Fin.    | 0        | 5           | 5          | 0         | 5       | 0        | 0     | 0       | 5        | 5        | 5      |
|               | Obj.    | 6,548    | -55,900,000 | 20,600,000 | 16,862    | -19.98  | 3,090    | 7,615 | 258,411 | 8,640.78 | 2,721.47 | 2.96   |
|               | Nodes   | 123      | 10,000      | 10,000     | 235       | 10,000  | 291      | 612   | 8,614   | 10,000   | 10,000   | 10,000 |
|               | Time    | 1.58     | 127.51      | 22.36      | 10.80     | 39.96   | 0.07     | 1.78  | 7.55    | 23.56    | 110.99   | 17.70  |
|               | Cl. Gap | 1        | 0.83        | 0.45       | 1         | 0.01    | 1        | 1     | 1       | 0.99     | 0.05     | 0.27   |

The row 'Cl. Gap' refers to the gap closed at the end of the optimization whether it achieved optimality or not. The row 'Fin. by all' indicates whether all methods were able to solve this problem to optimality. For each method, the 'Fin.' rows indicate the termination status of the optimization: 0 for optimality, 1 for unfeasibility, 2 for unboundedness, 3 for unfeasibility or unboundedness, 4 for another stopping criterion with a feasible solution found, and 5 for another stopping criterion with no feasible solution found.

**Table 10 Detailed results for the MIPLIB problems (4/4). Node limit =  $10^5$  nodes.**

| Problem names |         | pp08a    | pp08aCUTS | qiu      | rentacar   | rgn   | set1ch    | stein27 | stein45 | tr12-30   | vpm1   | vpm2   |
|---------------|---------|----------|-----------|----------|------------|-------|-----------|---------|---------|-----------|--------|--------|
| LP Obj.       |         | 2,748.35 | 5,480.61  | -931.64  | 28,800,000 | 48.80 | 32,007.70 | 13      | 22      | 14,210.40 | 15.42  | 9.89   |
| True Obj.     |         | 7,350    | 7,350     | -132.87  | 30,400,000 | 82.20 | 54,537.80 | 18      | 30      | 131,000   | 20     | 13.75  |
| Fin. by all   |         | 0        | 0         | 0        | 1          | 1     | 0         | 1       | 0       | 0         | 0      | 0      |
| Method        |         |          |           |          |            |       |           |         |         |           |        |        |
| Random        | Fin.    | 5        | 5         | 5        | 0          | 0     | 5         | 0       | 5       | 5         | 5      | 5      |
|               | Obj.    | 4,270.24 | 6,265.34  | -350.96  | 30,400,000 | 82.20 | 36,346.60 | 18      | 27.50   | 21,683.40 | 16.63  | 11.33  |
|               | Nodes   | 10,000   | 10,000    | 10,000   | 41         | 5,947 | 10,000    | 4,283   | 10,000  | 10,000    | 10,000 | 10,000 |
|               | Time    | 1.77     | 4.44      | 97.92    | 4.54       | 0.83  | 3.73      | 0.60    | 3.99    | 4.40      | 2.48   | 3.01   |
|               | Cl. Gap | 0.33     | 0.42      | 0.73     | 1          | 1     | 0.19      | 1       | 0.69    | 0.06      | 0.27   | 0.37   |
| MIB           | Fin.    | 5        | 5         | 5        | 0          | 0     | 5         | 0       | 5       | 5         | 5      | 5      |
|               | Obj.    | 4,601.49 | 6,269.34  | -344.50  | 30,400,000 | 82.20 | 35,370.60 | 18      | 27.33   | 23,785.10 | 16.97  | 11.32  |
|               | Nodes   | 10,000   | 10,000    | 10,000   | 26         | 4,147 | 10,000    | 4,681   | 10,000  | 10,000    | 10,000 | 10,000 |
|               | Time    | 1.77     | 5.07      | 88.89    | 3.48       | 0.58  | 3.87      | 0.64    | 3.75    | 4.73      | 2.58   | 3.17   |
|               | Cl. Gap | 0.40     | 0.42      | 0.74     | 1          | 1     | 0.15      | 1       | 0.67    | 0.08      | 0.34   | 0.37   |
| NCB           | Fin.    | 5        | 5         | 5        | 0          | 0     | 5         | 0       | 5       | 5         | 5      | 5      |
|               | Obj.    | 5,078.04 | 6,729.63  | -156.37  | 30,400,000 | 82.20 | 39,908.60 | 18      | 27.50   | 26,409.90 | 18.23  | 12.53  |
|               | Nodes   | 10,000   | 10,000    | 10,000   | 26         | 2,735 | 10,000    | 3,240   | 10,000  | 10,000    | 10,000 | 10,000 |
|               | Time    | 18.01    | 58.62     | 1,403.40 | 24.52      | 1.03  | 37.06     | 1.77    | 47.48   | 50.81     | 10.54  | 36.48  |
|               | Cl. Gap | 0.51     | 0.67      | 0.97     | 1          | 1     | 0.35      | 1       | 0.69    | 0.10      | 0.61   | 0.69   |
| FSB           | Fin.    | 5        | 5         | 5        | 0          | 0     | 5         | 0       | 5       | 5         | 5      | 5      |
|               | Obj.    | 5,174.11 | 6,697.22  | -216.31  | 30,400,000 | 82.20 | 40,156.80 | 18      | 28.07   | 27,009.20 | 18.05  | 12.50  |
|               | Nodes   | 10,000   | 10,000    | 10,000   | 26         | 2,849 | 10,000    | 2,141   | 10,000  | 10,000    | 10,000 | 10,000 |
|               | Time    | 73.86    | 199.13    | 3,404.77 | 32.19      | 1.74  | 592       | 3.51    | 181.32  | 1,724.58  | 28.28  | 66.18  |
|               | Cl. Gap | 0.53     | 0.65      | 0.90     | 1          | 1     | 0.36      | 1       | 0.76    | 0.11      | 0.57   | 0.67   |
| RB            | Fin.    | 5        | 5         | 4        | 0          | 0     | 5         | 0       | 5       | 5         | 5      | 5      |
|               | Obj.    | 4,659.35 | 6,567.33  | -143.30  | 30,400,000 | 82.20 | 40,319    | 18      | 27.50   | 26,487    | 17.78  | 11.89  |
|               | Nodes   | 10,000   | 10,000    | 10,000   | 21         | 2,701 | 10,000    | 3,980   | 10,000  | 10,000    | 10,000 | 10,000 |
|               | Time    | 6.23     | 15.49     | 436.22   | 18.23      | 0.77  | 9.60      | 1.41    | 21.27   | 13.61     | 5.67   | 19     |
|               | Cl. Gap | 0.42     | 0.58      | 0.99     | 1          | 1     | 0.37      | 1       | 0.69    | 0.11      | 0.52   | 0.52   |
| Learned       | Fin.    | 5        | 5         | 5        | 0          | 0     | 5         | 0       | 5       | 5         | 5      | 5      |
|               | Obj.    | 4,730.36 | 6,490.81  | -279.63  | 30,400,000 | 82.20 | 39,600    | 18      | 27.50   | 24,065.90 | 16.95  | 11.35  |
|               | Nodes   | 10,000   | 10,000    | 10,000   | 36         | 3,401 | 10,000    | 4,140   | 10,000  | 10,000    | 10,000 | 10,000 |
|               | Time    | 42.04    | 51.12     | 152.68   | 4.32       | 1.20  | 120       | 3.13    | 31.06   | 366.50    | 16.07  | 31.62  |
|               | Cl. Gap | 0.43     | 0.54      | 0.82     | 1          | 1     | 0.34      | 1       | 0.69    | 0.08      | 0.33   | 0.38   |

The row 'Cl. Gap' refers to the gap closed at the end of the optimization whether it achieved optimality or not. The row 'Fin. by all' indicates whether all methods were able to solve this problem to optimality. For each method, the 'Fin.' rows indicate the termination status of the optimization: 0 for optimality, 1 for unfeasibility, 2 for unboundedness, 3 for unfeasibility or unboundedness, 4 for another stopping criterion with a feasible solution found, and 5 for another stopping criterion with no feasible solution found.

Table 11 Detailed results for the MIPLIB problems (1/4). Time limit = 600 seconds.

| Problem names |         | 10teams | aflow30a | aflow40b | air03   | air04     | air05     | cap6000    | dcmulti | egout  | fiber     | fixnet6   |
|---------------|---------|---------|----------|----------|---------|-----------|-----------|------------|---------|--------|-----------|-----------|
| LP Obj.       |         | 917     | 983.17   | 1,005.66 | 338,864 | 55,535.40 | 25,877.60 | -2,451,540 | 183,976 | 149.59 | 156,083   | 1,200.88  |
| True Obj.     |         | 924     | 1,158    | 1,168    | 340,160 | 56,137    | 26,374    | -2,451,200 | 188,182 | 568.10 | 405,935   | 3,983     |
| Fin. by all   |         | 0       | 0        | 0        | 1       | 0         | 0         | 1          | 1       | 1      | 0         | 0         |
| Method        |         |         |          |          |         |           |           |            |         |        |           |           |
| Random        | Fin.    | 4       | 5        | 5        | 0       | 5         | 4         | 0          | 0       | 0      | 5         | 5         |
|               | Obj.    | 917     | 1,105.30 | 1,061.77 | 340,160 | 55,798.10 | 26,181.90 | -2,451,380 | 188,182 | 568.10 | 217,681   | 1,837.57  |
|               | Nodes   | 20,337  | 603,128  | 141,714  | 25      | 762       | 3,742     | 81,127     | 87,985  | 11,855 | 1,076,478 | 1,304,269 |
|               | Time    | 600.01  | 600.01   | 600.01   | 1.45    | 600.02    | 600.02    | 263.52     | 46.17   | 1.31   | 600.01    | 600.01    |
|               | Cl. Gap | 0       | 0.70     | 0.35     | 1       | 0.44      | 0.61      | 0.47       | 1       | 1      | 0.25      | 0.23      |
| MIB           | Fin.    | 4       | 5        | 5        | 0       | 5         | 5         | 0          | 0       | 0      | 5         | 5         |
|               | Obj.    | 920.27  | 1,114.89 | 1,057.98 | 340,160 | 55,849.90 | 26,221    | -2,451,340 | 188,182 | 568.10 | 216,400   | 2,481.05  |
|               | Nodes   | 28,721  | 565,662  | 133,573  | 7       | 872       | 3,877     | 22,637     | 9,493   | 7,015  | 966,294   | 1,250,501 |
|               | Time    | 600.01  | 600.01   | 600.01   | 0.60    | 600.10    | 600.02    | 64.25      | 4.48    | 0.80   | 600.01    | 600.01    |
|               | Cl. Gap | 0.47    | 0.75     | 0.32     | 1       | 0.52      | 0.69      | 0.59       | 1       | 1      | 0.24      | 0.46      |
| NCB           | Fin.    | 0       | 5        | 4        | 0       | 5         | 5         | 0          | 0       | 0      | 0         | 5         |
|               | Obj.    | 924     | 1,103.67 | 1,141.45 | 340,160 | 55,787.30 | 26,285.90 | -2,451,340 | 188,182 | 568.10 | 405,935   | 2,766.69  |
|               | Nodes   | 1,453   | 16,178   | 52,727   | 3       | 12        | 104       | 17,214     | 1,065   | 5,713  | 88,143    | 69,931    |
|               | Time    | 456.95  | 600.01   | 600.01   | 2.04    | 600.06    | 600.01    | 261.12     | 3.04    | 1.99   | 275.17    | 600.01    |
|               | Cl. Gap | 1       | 0.69     | 0.84     | 1       | 0.42      | 0.82      | 0.59       | 1       | 1      | 1         | 0.56      |
| FSB           | Fin.    | 5       | 4        | 5        | 0       | 5         | 5         | 0          | 0       | 0      | 4         | 5         |
|               | Obj.    | 923     | 1,135.33 | 1,095.06 | 340,160 | 55,632.60 | 26,139.10 | -2,451,340 | 188,182 | 568.10 | 380,621   | 2,593.05  |
|               | Nodes   | 102     | 27,814   | 6,023    | 3       | 6         | 23        | 15,732     | 927     | 4,725  | 24,604    | 25,867    |
|               | Time    | 600.10  | 600.01   | 600.01   | 2.76    | 600.18    | 600.16    | 254.21     | 4.87    | 2.23   | 600.01    | 600.01    |
|               | Cl. Gap | 0.86    | 0.87     | 0.55     | 1       | 0.16      | 0.53      | 0.59       | 1       | 1      | 0.90      | 0.50      |
| RB            | Fin.    | 5       | 4        | 5        | 0       | 5         | 5         | 0          | 0       | 0      | 4         | 5         |
|               | Obj.    | 917     | 1,149.05 | 1,102.58 | 340,160 | 55,823.60 | 26,227.20 | -2,451,340 | 188,182 | 568.10 | 382,623   | 2,773.55  |
|               | Nodes   | 4,018   | 147,308  | 44,452   | 3       | 247       | 612       | 18,989     | 1,013   | 9,143  | 289,900   | 343,403   |
|               | Time    | 600.01  | 600.01   | 600.01   | 0.52    | 600.03    | 600.02    | 225.13     | 1.80    | 2.39   | 600.01    | 600.01    |
|               | Cl. Gap | 0       | 0.95     | 0.60     | 1       | 0.48      | 0.70      | 0.59       | 1       | 1      | 0.91      | 0.57      |
| Learned       | Fin.    | 0       | 5        | 5        | 0       | 5         | 5         | 0          | 0       | 0      | 5         | 5         |
|               | Obj.    | 924     | 1,104.13 | 1,046.45 | 340,160 | 55,992.20 | 26,224.70 | -2,451,380 | 188,182 | 568.10 | 372,086   | 2,411.64  |
|               | Nodes   | 1,739   | 120,872  | 43,281   | 3       | 553       | 2,083     | 66,587     | 1,565   | 3,007  | 150,084   | 104,029   |
|               | Time    | 108.28  | 600.01   | 600.01   | 0.49    | 600.01    | 600.01    | 314.71     | 2.74    | 1.31   | 600.01    | 600.01    |
|               | Cl. Gap | 1       | 0.69     | 0.25     | 1       | 0.76      | 0.70      | 0.47       | 1       | 1      | 0.86      | 0.44      |

The row 'Cl. Gap' refers to the gap closed at the end of the optimization whether it achieved optimality or not. The row 'Fin. by all' indicates whether all methods were able to solve this problem to optimality. For each method, the 'Fin.' rows indicate the termination status of the optimization: 0 for optimality, 1 for unfeasibility, 2 for unboundedness, 3 for unfeasibility or unboundedness, 4 for another stopping criterion with a feasible solution found, and 5 for another stopping criterion with no feasible solution found.

**Table 12 Detailed results for the MIPLIB problems (2/4). Time limit = 600 seconds.**

| Problem names |         | harp2       | khb05250    | l152lav  | lseu    | mas74     | mas76     | misc03 | misc06    | misc07 | mitre   | mod008 |
|---------------|---------|-------------|-------------|----------|---------|-----------|-----------|--------|-----------|--------|---------|--------|
| LP Obj.       |         | -74,325,200 | 95,919,500  | 4,656.36 | 834.68  | 10,482.80 | 38,893.90 | 1,910  | 12,841.70 | 1,415  | 114,741 | 290.93 |
| True Obj.     |         | -73,899,300 | 106,940,000 | 4,722    | 1,120   | 11,801.20 | 40,005.10 | 3,360  | 12,850.90 | 2,810  | 115,155 | 307    |
| Fin. by all   |         | 0           | 1           | 1        | 1       | 0         | 0         | 1      | 1         | 1      | 0       | 1      |
| Method        |         |             |             |          |         |           |           |        |           |        |         |        |
| Random        | Fin.    | 5           | 0           | 0        | 0       | 5         | 4         | 0      | 0         | 0      | 5       | 0      |
|               | Obj.    | -74,231,300 | 106,940,000 | 4,722    | 1,120   | 11,227.40 | 39,899.60 | 3,360  | 12,851.10 | 2,810  | 115,131 | 307    |
|               | Nodes   | 219,404     | 11,555      | 57,281   | 112,035 | 1,092,445 | 1,662,754 | 1,179  | 527       | 82,081 | 63,300  | 10,307 |
|               | Time    | 600.03      | 7.15        | 107.70   | 10.23   | 600.01    | 600.01    | 0.52   | 0.70      | 53.43  | 600.01  | 1.54   |
|               | Cl. Gap | 0.22        | 1           | 1        | 1       | 0.56      | 0.91      | 1      | 1.02      | 1      | 0.94    | 1      |
| MIB           | Fin.    | 5           | 0           | 0        | 0       | 5         | 4         | 0      | 0         | 0      | 0       | 0      |
|               | Obj.    | -74,236,200 | 106,940,000 | 4,722    | 1,120   | 11,245.90 | 39,888.20 | 3,360  | 12,850.90 | 2,810  | 115,155 | 307    |
|               | Nodes   | 260,188     | 7,477       | 42,037   | 52,413  | 1,046,064 | 1,230,909 | 629    | 551       | 24,005 | 986     | 9,091  |
|               | Time    | 600.03      | 4.96        | 96.91    | 6.10    | 600.01    | 600.01    | 0.33   | 0.77      | 15.88  | 30.04   | 1.51   |
|               | Cl. Gap | 0.21        | 1           | 1        | 1       | 0.58      | 0.89      | 1      | 1         | 1      | 1       | 1      |
| NCB           | Fin.    | 5           | 0           | 0        | 0       | 5         | 4         | 0      | 0         | 0      | 0       | 0      |
|               | Obj.    | -74,019,800 | 106,940,000 | 4,722    | 1,120   | 11,349.60 | 39,784.90 | 3,360  | 12,850.90 | 2,810  | 115,155 | 307    |
|               | Nodes   | 52,988      | 1,527       | 213      | 18,533  | 171,360   | 234,705   | 579    | 56        | 32,873 | 617     | 4,605  |
|               | Time    | 600.01      | 4.79        | 4.57     | 7.24    | 600.01    | 600.01    | 2.71   | 0.59      | 254.98 | 49.25   | 2.91   |
|               | Cl. Gap | 0.72        | 1           | 1        | 1       | 0.66      | 0.80      | 1      | 1         | 1      | 1       | 1      |
| FSB           | Fin.    | 5           | 0           | 0        | 0       | 5         | 4         | 0      | 0         | 0      | 0       | 0      |
|               | Obj.    | -74,040,700 | 106,940,000 | 4,722    | 1,120   | 11,310.80 | 39,786.60 | 3,360  | 12,850.90 | 2,810  | 115,155 | 307    |
|               | Nodes   | 17,259      | 1,502       | 238      | 24,957  | 132,769   | 178,936   | 371    | 55        | 25,551 | 709     | 3,333  |
|               | Time    | 600.02      | 7.40        | 48.17    | 16.65   | 600.01    | 600.01    | 2.83   | 1.22      | 591.65 | 139.18  | 1.81   |
|               | Cl. Gap | 0.67        | 1           | 1        | 1       | 0.63      | 0.80      | 1      | 1         | 1      | 1       | 1      |
| RB            | Fin.    | 5           | 0           | 0        | 0       | 5         | 0         | 0      | 0         | 0      | 0       | 0      |
|               | Obj.    | -74,034,800 | 106,940,000 | 4,722    | 1,120   | 11,481.90 | 40,005.10 | 3,360  | 12,850.90 | 2,810  | 115,155 | 307    |
|               | Nodes   | 115,774     | 1,685       | 611      | 16,933  | 547,986   | 621,181   | 641    | 62        | 19,179 | 1,900   | 2,927  |
|               | Time    | 600.03      | 2.24        | 6.76     | 3.99    | 600.01    | 496.77    | 1.92   | 0.53      | 59.87  | 130.55  | 1.25   |
|               | Cl. Gap | 0.68        | 1           | 1        | 1       | 0.76      | 1         | 1      | 1         | 1      | 1       | 1      |
| Learned       | Fin.    | 5           | 0           | 0        | 0       | 5         | 4         | 0      | 0         | 0      | 0       | 0      |
|               | Obj.    | -74,115,700 | 106,940,000 | 4,722    | 1,120   | 11,230.50 | 39,753    | 3,360  | 12,850.90 | 2,810  | 115,155 | 307    |
|               | Nodes   | 90,166      | 5,790       | 1,061    | 23,707  | 301,782   | 403,888   | 1,865  | 161       | 97,197 | 470     | 6,365  |
|               | Time    | 600.01      | 8.24        | 8.66     | 11.39   | 600.01    | 600.01    | 2.24   | 0.53      | 174.27 | 26.21   | 3.59   |
|               | Cl. Gap | 0.49        | 1           | 1        | 1       | 0.57      | 0.77      | 1      | 1         | 1      | 1       | 1      |

The row 'Cl. Gap' refers to the gap closed at the end of the optimization whether it achieved optimality or not. The row 'Fin. by all' indicates whether all methods were able to solve this problem to optimality. For each method, the 'Fin.' rows indicate the termination status of the optimization: 0 for optimality, 1 for unfeasibility, 2 for unboundedness, 3 for unfeasibility or unboundedness, 4 for another stopping criterion with a feasible solution found, and 5 for another stopping criterion with no feasible solution found.

**Table 13 Detailed results for the MIPLIB problems (3/4). Time limit = 600 seconds.**

| Problem names |         | mod010   | mod011      | modglob    | nw04      | opt1217 | p0033    | p0201 | p0282     | p0548     | p2756    | pk1       |
|---------------|---------|----------|-------------|------------|-----------|---------|----------|-------|-----------|-----------|----------|-----------|
| LP Obj.       |         | 6,532.08 | -62,122,000 | 20,430,900 | 16,310.70 | -20.02  | 2,520.57 | 6,875 | 176,868   | 429.68    | 2,698.95 | 0         |
| True Obj.     |         | 6,548    | -54,558,500 | 20,740,500 | 16,862    | -16     | 3,089    | 7,615 | 258,411   | 8,691     | 3,124    | 11        |
| Fin. by all   |         | 1        | 0           | 0          | 1         | 0       | 1        | 1     | 0         | 0         | 0        | 0         |
| Method        |         |          |             |            |           |         |          |       |           |           |          |           |
| Random        | Fin.    | 0        | 5           | 5          | 0         | 5       | 0        | 0     | 5         | 5         | 5        | 4         |
|               | Obj.    | 6,548    | -55,956,000 | 20,607,600 | 16,862    | -20.02  | 3,089    | 7,615 | 192,124   | 2,085.24  | 2,733.15 | 10.92     |
|               | Nodes   | 27,055   | 82,469      | 1,293,324  | 259       | 687,665 | 4,859    | 649   | 1,712,728 | 1,285,332 | 529,728  | 1,346,758 |
|               | Time    | 47.98    | 600.01      | 600.01     | 10.81     | 600.01  | 0.32     | 0.45  | 600.01    | 600.01    | 600.01   | 600.01    |
|               | Cl. Gap | 1        | 0.82        | 0.57       | 1         | 0       | 1        | 1     | 0.19      | 0.20      | 0.08     | 0.99      |
| MIB           | Fin.    | 0        | 0           | 5          | 0         | 5       | 0        | 0     | 5         | 5         | 5        | 0         |
|               | Obj.    | 6,548    | -54,558,500 | 20,706,800 | 16,862    | -20.02  | 3,089    | 7,615 | 184,470   | 524.95    | 2,705.50 | 11        |
|               | Nodes   | 532      | 49,533      | 989,483    | 1,737     | 670,264 | 6,265    | 4,747 | 1,504,144 | 1,121,079 | 634,588  | 927,663   |
|               | Time    | 3.76     | 419.22      | 600.01     | 44.77     | 600.01  | 0.37     | 2.43  | 600.01    | 600.01    | 600.01   | 382.10    |
|               | Cl. Gap | 1        | 1           | 0.89       | 1         | 0       | 1        | 1     | 0.09      | 0.01      | 0.02     | 1         |
| NCB           | Fin.    | 0        | 5           | 5          | 0         | 5       | 0        | 0     | 0         | 0         | 5        | 5         |
|               | Obj.    | 6,548    | -56,157,900 | 20,682,800 | 16,862    | -19.65  | 3,089    | 7,615 | 258,411   | 8,691     | 2,984.96 | 9.95      |
|               | Nodes   | 96       | 2,518       | 176,901    | 355       | 260,272 | 745      | 173   | 624       | 18,782    | 34,910   | 151,768   |
|               | Time    | 2.50     | 600.05      | 600.01     | 62.35     | 600.01  | 0.12     | 1.17  | 1.14      | 42.31     | 600.01   | 600.01    |
|               | Cl. Gap | 1        | 0.79        | 0.81       | 1         | 0.09    | 1        | 1     | 1         | 1         | 0.67     | 0.90      |
| FSB           | Fin.    | 0        | 5           | 5          | 0         | 5       | 0        | 0     | 0         | 0         | 5        | 5         |
|               | Obj.    | 6,548    | -56,661,700 | 20,686,000 | 16,862    | -19.66  | 3,089    | 7,615 | 258,411   | 8,691     | 2,950.75 | 9.23      |
|               | Nodes   | 31       | 1,260       | 101,090    | 233       | 38,913  | 363      | 186   | 502       | 8,920     | 12,364   | 125,603   |
|               | Time    | 3.36     | 600.03      | 600.01     | 82.23     | 600.01  | 0.07     | 3.78  | 1.31      | 25.15     | 600.01   | 600.01    |
|               | Cl. Gap | 1        | 0.72        | 0.82       | 1         | 0.09    | 1        | 1     | 1         | 1         | 0.59     | 0.84      |
| RB            | Fin.    | 0        | 5           | 5          | 0         | 5       | 0        | 0     | 0         | 0         | 5        | 0         |
|               | Obj.    | 6,548    | -55,719,100 | 20,686,900 | 16,862    | -19.76  | 3,089    | 7,615 | 258,411   | 8,691     | 2,763.77 | 11        |
|               | Nodes   | 83       | 6,180       | 493,119    | 1,201     | 389,380 | 1,145    | 359   | 767       | 145,693   | 92,008   | 366,151   |
|               | Time    | 3.27     | 600.06      | 600.01     | 117.90    | 600.01  | 0.15     | 1.52  | 0.97      | 174.10    | 600.01   | 358.78    |
|               | Cl. Gap | 1        | 0.85        | 0.83       | 1         | 0.07    | 1        | 1     | 1         | 1         | 0.15     | 1         |
| Learned       | Fin.    | 0        | 0           | 5          | 0         | 5       | 0        | 0     | 0         | 0         | 5        | 5         |
|               | Obj.    | 6,548    | -54,558,500 | 20,600,400 | 16,862    | -19.93  | 3,089    | 7,615 | 258,411   | 8,691     | 2,728.89 | 8.60      |
|               | Nodes   | 123      | 46,907      | 259,394    | 235       | 135,183 | 291      | 612   | 8,614     | 86,603    | 53,100   | 362,383   |
|               | Time    | 1.59     | 564.95      | 600.01     | 10.68     | 600.01  | 0.07     | 1.73  | 7.56      | 110.72    | 600.01   | 600.01    |
|               | Cl. Gap | 1        | 1           | 0.55       | 1         | 0.02    | 1        | 1     | 1         | 1         | 0.07     | 0.78      |

The row 'Cl. Gap' refers to the gap closed at the end of the optimization whether it achieved optimality or not. The row 'Fin. by all' indicates whether all methods were able to solve this problem to optimality. For each method, the 'Fin.' rows indicate the termination status of the optimization: 0 for optimality, 1 for unfeasibility, 2 for unboundedness, 3 for unfeasibility or unboundedness, 4 for another stopping criterion with a feasible solution found, and 5 for another stopping criterion with no feasible solution found.

**Table 14 Detailed results for the MIPLIB problems (4/4). Time limit = 600 seconds.**

| Problem names |         | pp08a     | pp08aCUTS | qiu     | rentacar   | rgn   | set1ch    | stein27 | stein45 | tr12-30   | vpm1      | vpm2      |
|---------------|---------|-----------|-----------|---------|------------|-------|-----------|---------|---------|-----------|-----------|-----------|
| LP Obj.       |         | 2,748.35  | 5,480.61  | -931.64 | 28,806,100 | 48.80 | 32,007.70 | 13      | 22      | 14,210.40 | 15.42     | 9.89      |
| True Obj.     |         | 7,350     | 7,350     | -132.87 | 30,356,800 | 82.20 | 54,537.80 | 18      | 30      | 130,596   | 20        | 13.75     |
| Fin. by all   |         | 0         | 0         | 0       | 1          | 1     | 0         | 1       | 1       | 0         | 0         | 0         |
| Method        |         |           |           |         |            |       |           |         |         |           |           |           |
| Random        | Fin.    | 5         | 5         | 4       | 0          | 0     | 5         | 0       | 0       | 5         | 5         | 5         |
|               | Obj.    | 5,198.76  | 6,756.75  | -226.26 | 30,356,800 | 82.20 | 37,522.60 | 18      | 30      | 24,059.40 | 18.25     | 12.60     |
|               | Nodes   | 1,725,290 | 1,103,681 | 74,246  | 41         | 5,947 | 1,351,176 | 4,283   | 63,115  | 1,251,955 | 1,608,231 | 1,455,001 |
|               | Time    | 600.01    | 600.01    | 600.01  | 4.54       | 0.85  | 600.01    | 0.60    | 20.25   | 600.01    | 600.01    | 600.05    |
|               | Cl. Gap | 0.53      | 0.68      | 0.88    | 1          | 1     | 0.24      | 1       | 1       | 0.08      | 0.62      | 0.70      |
| MIB           | Fin.    | 5         | 5         | 4       | 0          | 0     | 5         | 0       | 0       | 5         | 5         | 5         |
|               | Obj.    | 5,625.42  | 6,817.68  | -211.52 | 30,356,800 | 82.20 | 35,814.40 | 18      | 30      | 26,437.20 | 18.55     | 12.60     |
|               | Nodes   | 1,525,690 | 1,001,129 | 80,056  | 26         | 4,147 | 1,174,846 | 4,681   | 86,199  | 1,049,709 | 1,563,746 | 1,331,407 |
|               | Time    | 600.01    | 600.01    | 600.01  | 3.49       | 0.60  | 600.01    | 0.66    | 26.17   | 600.02    | 600.01    | 600       |
|               | Cl. Gap | 0.63      | 0.72      | 0.90    | 1          | 1     | 0.17      | 1       | 1       | 0.11      | 0.68      | 0.70      |
| NCB           | Fin.    | 5         | 5         | 5       | 0          | 0     | 5         | 0       | 0       | 5         | 5         | 5         |
|               | Obj.    | 5,800.71  | 6,988.93  | -229.11 | 30,356,800 | 82.20 | 41,291.10 | 18      | 30      | 28,983.30 | 19.25     | 13.16     |
|               | Nodes   | 223,945   | 86,240    | 4,592   | 26         | 2,735 | 122,404   | 3,239   | 44,219  | 120,874   | 501,139   | 142,007   |
|               | Time    | 600.01    | 600.01    | 600.01  | 24.52      | 1.06  | 600.01    | 1.80    | 149.92  | 600.01    | 600.01    | 600       |
|               | Cl. Gap | 0.66      | 0.81      | 0.88    | 1          | 1     | 0.41      | 1       | 1       | 0.13      | 0.84      | 0.85      |
| FSB           | Fin.    | 5         | 5         | 5       | 0          | 0     | 5         | 0       | 0       | 5         | 5         | 5         |
|               | Obj.    | 5,666.07  | 6,864.18  | -399.43 | 30,356,800 | 82.20 | 40,157.30 | 18      | 30      | 25,847.50 | 19        | 13.06     |
|               | Nodes   | 87,459    | 32,806    | 1,360   | 26         | 2,849 | 10,008    | 2,141   | 24,835  | 3,496     | 282,230   | 105,079   |
|               | Time    | 600.01    | 600.01    | 600.01  | 32.21      | 1.80  | 600.02    | 3.61    | 285.03  | 600.02    | 600.01    | 600.01    |
|               | Cl. Gap | 0.63      | 0.74      | 0.67    | 1          | 1     | 0.36      | 1       | 1       | 0.10      | 0.78      | 0.82      |
| RB            | Fin.    | 5         | 5         | 0       | 0          | 0     | 5         | 0       | 0       | 5         | 0         | 5         |
|               | Obj.    | 5,649.88  | 7,082.74  | -132.87 | 30,356,800 | 82.20 | 42,397.10 | 18      | 30      | 30,376.10 | 20        | 12.79     |
|               | Nodes   | 643,995   | 305,396   | 14,923  | 21         | 2,701 | 492,097   | 3,975   | 50,335  | 418,805   | 649,531   | 299,538   |
|               | Time    | 600.01    | 600.01    | 477.28  | 18.20      | 0.78  | 600.01    | 1.44    | 70.49   | 600.01    | 446.18    | 600.01    |
|               | Cl. Gap | 0.63      | 0.86      | 1       | 1          | 1     | 0.46      | 1       | 1       | 0.14      | 1         | 0.75      |
| Learned       | Fin.    | 5         | 5         | 5       | 0          | 0     | 5         | 0       | 0       | 5         | 5         | 5         |
|               | Obj.    | 5,318.51  | 6,828.05  | -179.74 | 30,356,800 | 82.20 | 40,650.20 | 18      | 30      | 24,425.10 | 18.18     | 12.24     |
|               | Nodes   | 166,483   | 129,426   | 47,914  | 36         | 3,401 | 52,779    | 4,141   | 50,013  | 16,200    | 448,168   | 219,927   |
|               | Time    | 600.01    | 600.01    | 600.01  | 4.32       | 1.20  | 600.01    | 3.12    | 97.31   | 600.03    | 600.01    | 600       |
|               | Cl. Gap | 0.56      | 0.72      | 0.94    | 1          | 1     | 0.38      | 1       | 1       | 0.09      | 0.60      | 0.61      |

The row 'Cl. Gap' refers to the gap closed at the end of the optimization whether it achieved optimality or not. The row 'Fin. by all' indicates whether all methods were able to solve this problem to optimality. For each method, the 'Fin.' rows indicate the termination status of the optimization: 0 for optimality, 1 for unfeasibility, 2 for unboundedness, 3 for unfeasibility or unboundedness, 4 for another stopping criterion with a feasible solution found, and 5 for another stopping criterion with no feasible solution found.

**Table 15 Detailed results for the updated list of MIPLIB problems (1/3). Time limit = none.**

| Problem names |             | aflow30a   | air03   | air04     | air05     | cap6000    | dcmulti | egout  | khb05250    | l152lav  | lseu    |
|---------------|-------------|------------|---------|-----------|-----------|------------|---------|--------|-------------|----------|---------|
|               | LP Obj.     | 983.17     | 338,864 | 55,535.40 | 25,877.60 | -2,451,540 | 183,976 | 149.59 | 95,919,500  | 4,656.36 | 834.68  |
|               | True Obj.   | 1,158      | 340,160 | 56,137    | 26,374    | -2,451,200 | 188,182 | 568.10 | 106,940,000 | 4,722    | 1,120   |
|               | Fin. by all | 1          | 1       | 1         | 1         | 1          | 1       | 1      | 1           | 1        | 1       |
| Method        |             |            |         |           |           |            |         |        |             |          |         |
| Random        | Fin.        | 0          | 0       | 0         | 0         | 0          | 0       | 0      | 0           | 0        | 0       |
|               | Obj.        | 1,158      | 340,160 | 56,137    | 26,374    | -2,450,000 | 188,182 | 568.10 | 107,000,000 | 4,722    | 1,120   |
|               | Nodes       | 15,800,801 | 25      | 130,471   | 88,241    | 81,127     | 87,985  | 11,855 | 11,555      | 57,281   | 112,035 |
|               | Time        | 19,276.30  | 1.44    | 9,228.73  | 4,613     | 259.32     | 45.45   | 1.27   | 6.85        | 106.19   | 9.82    |
|               | Cl. Gap     | 1          | 1       | 1         | 1         | 4.53       | 1       | 1      | 1.01        | 1        | 1       |
| MIB           | Fin.        | 0          | 0       | 0         | 0         | 0          | 0       | 0      | 0           | 0        | 0       |
|               | Obj.        | 1,158      | 340,160 | 56,137    | 26,374    | -2,451,340 | 188,182 | 568.10 | 106,940,000 | 4,722    | 1,120   |
|               | Nodes       | 7,691,239  | 7       | 105,821   | 66,991    | 22,637     | 9,493   | 7,015  | 7,477       | 42,037   | 52,413  |
|               | Time        | 9,109.39   | 0.59    | 14,008.90 | 5,642.01  | 63.34      | 4.44    | 0.77   | 4.77        | 95.61    | 5.78    |
|               | Cl. Gap     | 1          | 1       | 1         | 1         | 0.59       | 1       | 1      | 1           | 1        | 1       |
| NCB           | Fin.        | 0          | 0       | 0         | 0         | 0          | 0       | 0      | 0           | 0        | 0       |
|               | Obj.        | 1,158      | 340,160 | 56,137    | 26,374    | -2,451,340 | 188,182 | 568.10 | 106,940,000 | 4,722    | 1,120   |
|               | Nodes       | 137,895    | 3       | 131       | 215       | 17,214     | 1,065   | 5,713  | 1,527       | 213      | 18,533  |
|               | Time        | 1,296.89   | 2.02    | 1,133.76  | 768.24    | 256.47     | 2.98    | 1.93   | 4.71        | 4.51     | 6.93    |
|               | Cl. Gap     | 1          | 1       | 1         | 1         | 0.59       | 1       | 1      | 1           | 1        | 1       |
| FSB           | Fin.        | 0          | 0       | 0         | 0         | 0          | 0       | 0      | 0           | 0        | 0       |
|               | Obj.        | 1,158      | 340,160 | 56,137    | 26,374    | -2,451,340 | 188,182 | 568.10 | 106,940,000 | 4,722    | 1,120   |
|               | Nodes       | 118,057    | 3       | 111       | 177       | 15,732     | 927     | 4,725  | 1,502       | 238      | 24,957  |
|               | Time        | 2,073.98   | 2.73    | 3,224.13  | 3,812.73  | 250.59     | 4.81    | 2.13   | 7.22        | 47.27    | 15.98   |
|               | Cl. Gap     | 1          | 1       | 1         | 1         | 0.59       | 1       | 1      | 1           | 1        | 1       |
| RB            | Fin.        | 0          | 0       | 0         | 0         | 0          | 0       | 0      | 0           | 0        | 0       |
|               | Obj.        | 1,158      | 340,160 | 56,137    | 26,374    | -2,451,340 | 188,182 | 568.10 | 106,940,000 | 4,722    | 1,120   |
|               | Nodes       | 230,038    | 3       | 3,601     | 1,489     | 18,989     | 1,013   | 9,143  | 1,685       | 611      | 16,933  |
|               | Time        | 898.36     | 0.52    | 2,760.38  | 1,449.85  | 222.89     | 1.77    | 2.31   | 2.17        | 6.66     | 3.83    |
|               | Cl. Gap     | 1          | 1       | 1         | 1         | 0.59       | 1       | 1      | 1           | 1        | 1       |
| Learned       | Fin.        | 0          | 0       | 0         | 0         | 0          | 0       | 0      | 0           | 0        | 0       |
|               | Obj.        | 1,158      | 340,160 | 56,137    | 26,374    | -2,451,380 | 188,182 | 568.10 | 106,940,000 | 4,722    | 1,120   |
|               | Nodes       | 2,825,981  | 3       | 3,833     | 65,305    | 66,587     | 1,565   | 3,007  | 5,790       | 1,061    | 23,707  |
|               | Time        | 8,755.66   | 0.48    | 1,613.37  | 5,141.27  | 310.41     | 2.30    | 1.07   | 7.13        | 7.88     | 8.99    |
|               | Cl. Gap     | 1          | 1       | 1         | 1         | 0.47       | 1       | 1      | 1           | 1        | 1       |

The row ‘Cl. Gap’ refers to the gap closed at the end of the optimization whether it achieved optimality or not. The row ‘Fin. by all’ indicates whether all methods were able to solve this problem to optimality. For each method, the ‘Fin.’ rows indicate the termination status of the optimization: 0 for optimality, 1 for unfeasibility, 2 for unboundedness, 3 for unfeasibility or unboundedness, 4 for another stopping criterion with a feasible solution found, and 5 for another stopping criterion with no feasible solution found.

**Table 16 Detailed results for the updated list of MIPLIB problems (2/3). Time limit = none.**

| Problem names |             | mas76     | misc03 | misc06    | misc07 | mitre    | mod008 | mod010   | mod011      | nw04      | p0033    |
|---------------|-------------|-----------|--------|-----------|--------|----------|--------|----------|-------------|-----------|----------|
|               | LP Obj.     | 38,893.90 | 1,910  | 12,841.70 | 1,415  | 114,741  | 290.93 | 6,532.08 | -62,122,000 | 16,310.70 | 2,520.57 |
|               | True Obj.   | 40,005.10 | 3,360  | 12,850.90 | 2,810  | 115,155  | 307    | 6,548    | -54,558,500 | 16,862    | 3,089    |
|               | Fin. by all | 1         | 1      | 1         | 1      | 1        | 1      | 1        | 1           | 1         | 1        |
| Method        |             |           |        |           |        |          |        |          |             |           |          |
| Random        | Fin.        | 0         | 0      | 0         | 0      | 0        | 0      | 0        | 0           | 0         | 0        |
|               | Obj.        | 40,005.10 | 3,360  | 12,851.10 | 2,810  | 115,155  | 307    | 6,548    | -54,600,000 | 16,862    | 3,089    |
|               | Nodes       | 2,306,195 | 1,179  | 527       | 82,081 | 288,265  | 10,307 | 27,055   | 517,237     | 259       | 4,859    |
|               | Time        | 693.85    | 0.50   | 0.70      | 52.66  | 1,606.37 | 1.49   | 47.67    | 4,072.82    | 10.63     | 0.30     |
|               | Cl. Gap     | 1         | 1      | 1.02      | 1      | 1        | 1      | 1        | 0.99        | 1         | 1        |
| MIB           | Fin.        | 0         | 0      | 0         | 0      | 0        | 0      | 0        | 0           | 0         | 0        |
|               | Obj.        | 40,005.10 | 3,360  | 12,850.90 | 2,810  | 115,155  | 307    | 6,548    | -54,558,500 | 16,862    | 3,089    |
|               | Nodes       | 2,097,725 | 629    | 551       | 24,005 | 986      | 9,091  | 532      | 49,533      | 1,737     | 6,265    |
|               | Time        | 760.55    | 0.32   | 0.77      | 15.67  | 29.70    | 1.45   | 3.70     | 410.90      | 44.66     | 0.35     |
|               | Cl. Gap     | 1         | 1      | 1         | 1      | 1        | 1      | 1        | 1           | 1         | 1        |
| NCB           | Fin.        | 0         | 0      | 0         | 0      | 0        | 0      | 0        | 0           | 0         | 0        |
|               | Obj.        | 40,005.10 | 3,360  | 12,850.90 | 2,810  | 115,155  | 307    | 6,548    | -54,558,500 | 16,862    | 3,089    |
|               | Nodes       | 783,139   | 579    | 56        | 32,873 | 617      | 4,605  | 96       | 19,617      | 355       | 745      |
|               | Time        | 1,491.35  | 2.65   | 0.58      | 250.44 | 48.30    | 2.82   | 2.47     | 5,422.18    | 61.96     | 0.10     |
|               | Cl. Gap     | 1         | 1      | 1         | 1      | 1        | 1      | 1        | 1           | 1         | 1        |
| FSB           | Fin.        | 0         | 0      | 0         | 0      | 0        | 0      | 0        | 0           | 0         | 0        |
|               | Obj.        | 40,005.10 | 3,360  | 12,850.90 | 2,810  | 115,155  | 307    | 6,548    | -54,558,500 | 16,862    | 3,089    |
|               | Nodes       | 597,109   | 371    | 55        | 25,551 | 709      | 3,333  | 31       | 18,283      | 233       | 363      |
|               | Time        | 1,466.68  | 2.78   | 1.19      | 581.55 | 137.07   | 1.75   | 3.28     | 6,409.24    | 81.40     | 0.06     |
|               | Cl. Gap     | 1         | 1      | 1         | 1      | 1        | 1      | 1        | 1           | 1         | 1        |
| RB            | Fin.        | 0         | 0      | 0         | 0      | 0        | 0      | 0        | 0           | 0         | 0        |
|               | Obj.        | 40,005.10 | 3,360  | 12,850.90 | 2,810  | 115,155  | 307    | 6,548    | -54,558,500 | 16,862    | 3,089    |
|               | Nodes       | 621,181   | 641    | 62        | 19,179 | 1,900    | 2,927  | 83       | 25,873      | 1,201     | 1,145    |
|               | Time        | 477.96    | 1.89   | 0.53      | 59.32  | 128.88   | 1.22   | 3.23     | 2,715.15    | 116.54    | 0.13     |
|               | Cl. Gap     | 1         | 1      | 1         | 1      | 1        | 1      | 1        | 1           | 1         | 1        |
| Learned       | Fin.        | 0         | 0      | 0         | 0      | 0        | 0      | 0        | 0           | 0         | 0        |
|               | Obj.        | 40,005.10 | 3,360  | 12,850.90 | 2,810  | 115,155  | 307    | 6,548    | -54,558,500 | 16,862    | 3,089    |
|               | Nodes       | 1,722,679 | 1,865  | 161       | 97,197 | 470      | 6,365  | 123      | 46,907      | 235       | 291      |
|               | Time        | 2,232.96  | 1.90   | 0.50      | 153.05 | 24.88    | 2.94   | 1.51     | 544.07      | 10.78     | 0.05     |
|               | Cl. Gap     | 1         | 1      | 1         | 1      | 1        | 1      | 1        | 1           | 1         | 1        |

The row 'Cl. Gap' refers to the gap closed at the end of the optimization whether it achieved optimality or not. The row 'Fin. by all' indicates whether all methods were able to solve this problem to optimality. For each method, the 'Fin.' rows indicate the termination status of the optimization: 0 for optimality, 1 for unfeasibility, 2 for unboundedness, 3 for unfeasibility or unboundedness, 4 for another stopping criterion with a feasible solution found, and 5 for another stopping criterion with no feasible solution found.

**Table 17 Detailed results for the updated list of MIPLIB problems (3/3). Time limit = none.**

| Problem names |             | p0201 | pk1       | pp08aCUTS   | qiu      | rentacar   | rgn   | stein27 | stein45 | vpm1       | vpm2       |
|---------------|-------------|-------|-----------|-------------|----------|------------|-------|---------|---------|------------|------------|
|               | LP Obj.     | 6,875 | 0         | 5,480.61    | -931.64  | 28,806,100 | 48.80 | 13      | 22      | 15.42      | 9.89       |
|               | True Obj.   | 7,615 | 11        | 7,350       | -132.87  | 30,356,800 | 82.20 | 18      | 30      | 20         | 13.75      |
|               | Fin. by all | 1     | 1         | 1           | 1        | 1          | 1     | 1       | 1       | 1          | 1          |
| Method        |             |       |           |             |          |            |       |         |         |            |            |
| Random        | Fin.        | 0     | 0         | 0           | 0        | 0          | 0     | 0       | 0       | 0          | 0          |
|               | Obj.        | 7,615 | 11        | 7,350       | -132.87  | 30,400,000 | 82.20 | 18      | 30      | 20         | 13.75      |
|               | Nodes       | 649   | 1,400,487 | 172,918,239 | 411,879  | 41         | 5,947 | 4,283   | 63,115  | 14,838,614 | 25,017,647 |
|               | Time        | 0.44  | 585.92    | 793,141     | 2,523.43 | 4.48       | 0.81  | 0.58    | 19.91   | 17,681.30  | 27,319.80  |
|               | Cl. Gap     | 1     | 1         | 1           | 1        | 1.03       | 1     | 1       | 1       | 1          | 1          |
| MIB           | Fin.        | 0     | 0         | 0           | 0        | 0          | 0     | 0       | 0       | 0          | 0          |
|               | Obj.        | 7,615 | 11        | 7,350       | -132.87  | 30,356,800 | 82.20 | 18      | 30      | 20         | 13.75      |
|               | Nodes       | 4,747 | 927,663   | 63,144,303  | 337,813  | 26         | 4,147 | 4,681   | 86,199  | 8,953,981  | 20,513,193 |
|               | Time        | 2.36  | 365.08    | 161,744     | 2,058.33 | 3.44       | 0.56  | 0.63    | 25.79   | 7,629.32   | 19,579.40  |
|               | Cl. Gap     | 1     | 1         | 1           | 1        | 1          | 1     | 1       | 1       | 1          | 1          |
| NCB           | Fin.        | 0     | 0         | 0           | 0        | 0          | 0     | 0       | 0       | 0          | 0          |
|               | Obj.        | 7,615 | 11        | 7,350       | -132.87  | 30,356,800 | 82.20 | 18      | 30      | 20         | 13.75      |
|               | Nodes       | 173   | 257,925   | 1,744,935   | 16,865   | 26         | 2,735 | 3,239   | 44,219  | 621,984    | 640,044    |
|               | Time        | 1.15  | 957.74    | 17,663.10   | 1,610.02 | 24.15      | 1.02  | 1.76    | 146.05  | 735.40     | 2,188.64   |
|               | Cl. Gap     | 1     | 1         | 1           | 1        | 1          | 1     | 1       | 1       | 1          | 1          |
| FSB           | Fin.        | 0     | 0         | 0           | 0        | 0          | 0     | 0       | 0       | 0          | 0          |
|               | Obj.        | 7,615 | 11        | 7,350       | -132.87  | 30,356,800 | 82.20 | 18      | 30      | 20         | 13.75      |
|               | Nodes       | 186   | 306,805   | 1,561,719   | 49,693   | 26         | 2,849 | 2,141   | 24,835  | 465,770    | 644,925    |
|               | Time        | 3.69  | 1,041.17  | 17,645.50   | 7,136.80 | 31.84      | 1.73  | 3.49    | 276.55  | 954.07     | 2,692.21   |
|               | Cl. Gap     | 1     | 1         | 1           | 1        | 1          | 1     | 1       | 1       | 1          | 1          |
| RB            | Fin.        | 0     | 0         | 0           | 0        | 0          | 0     | 0       | 0       | 0          | 0          |
|               | Obj.        | 7,615 | 11        | 7,350       | -132.87  | 30,356,800 | 82.20 | 18      | 30      | 20         | 13.75      |
|               | Nodes       | 359   | 366,151   | 2,668,423   | 14,923   | 21         | 2,701 | 3,975   | 50,335  | 649,531    | 4,837,431  |
|               | Time        | 1.49  | 344.92    | 4,815.89    | 476.17   | 17.96      | 0.75  | 1.39    | 69.08   | 431.22     | 11,571.10  |
|               | Cl. Gap     | 1     | 1         | 1           | 1        | 1          | 1     | 1       | 1       | 1          | 1          |
| Learned       | Fin.        | 0     | 0         | 0           | 0        | 0          | 0     | 0       | 0       | 0          | 0          |
|               | Obj.        | 7,615 | 11        | 7,350       | -132.87  | 30,356,800 | 82.20 | 18      | 30      | 20         | 13.75      |
|               | Nodes       | 612   | 1,545,753 | 7,272,423   | 116,593  | 36         | 3,401 | 4,141   | 50,013  | 6,606,414  | 10,639,147 |
|               | Time        | 1.43  | 2,187.65  | 22,281.40   | 1,074.32 | 4.26       | 1.01  | 2.42    | 76.64   | 10,218.50  | 36,031.50  |
|               | Cl. Gap     | 1     | 1         | 1           | 1        | 1          | 1     | 1       | 1       | 1          | 1          |

The row ‘Cl. Gap’ refers to the gap closed at the end of the optimization whether it achieved optimality or not. The row ‘Fin. by all’ indicates whether all methods were able to solve this problem to optimality. For each method, the ‘Fin.’ rows indicate the termination status of the optimization: 0 for optimality, 1 for unfeasibility, 2 for unboundedness, 3 for unfeasibility or unboundedness, 4 for another stopping criterion with a feasible solution found, and 5 for another stopping criterion with no feasible solution found.

**Table 18 Detailed results for the updated list of MIPLIB problems (1/3). Time limit = none and CPLEX's cuts and heuristics applied.**

| Problem names |             | aflow30a | air03   | air04     | air05     | cap6000    | dcmulti | egout  | khb05250    | l152lav  | lseu   |
|---------------|-------------|----------|---------|-----------|-----------|------------|---------|--------|-------------|----------|--------|
|               | LP Obj.     | 983.17   | 338,864 | 55,535.40 | 25,877.60 | -2,451,540 | 183,976 | 149.59 | 95,919,500  | 4,656.36 | 834.68 |
|               | True Obj.   | 1,158    | 340,160 | 56,137    | 26,374    | -2,451,200 | 188,182 | 568.10 | 106,940,000 | 4,722    | 1,120  |
|               | Fin. by all | 1        | 1       | 1         | 1         | 1          | 1       | 1      | 1           | 1        | 1      |
| Method        |             |          |         |           |           |            |         |        |             |          |        |
| Random        | Fin.        | 0        | 0       | 0         | 0         | 0          | 0       | 0      | 0           | 0        | 0      |
|               | Obj.        | 1,158    | 340,160 | 56,137    | 26,374    | -2,450,000 | 188,188 | 568.10 | 107,000,000 | 4,722    | 1,120  |
|               | Nodes       | 58,369   | 0       | 50,847    | 29,149    | 180        | 641     | 3      | 5           | 45,433   | 185    |
|               | Time        | 256.88   | 0.59    | 3,956.43  | 1,839.59  | 4.06       | 1.58    | 0.01   | 0.41        | 324.38   | 0.13   |
|               | Cl. Gap     | 1        | 1       | 1         | 1         | 4.53       | 1       | 1      | 1.01        | 1        | 1      |
| MIB           | Fin.        | 0        | 0       | 0         | 0         | 0          | 0       | 0      | 0           | 0        | 0      |
|               | Obj.        | 1,158    | 340,160 | 56,137    | 26,374    | -2,451,350 | 188,188 | 568.10 | 106,940,000 | 4,722    | 1,120  |
|               | Nodes       | 35,205   | 0       | 46,139    | 38,793    | 60         | 125     | 3      | 3           | 29,545   | 97     |
|               | Time        | 203.06   | 0.60    | 4,403.65  | 2,607.30  | 1.30       | 0.71    | 0.01   | 0.42        | 227.48   | 0.11   |
|               | Cl. Gap     | 1        | 1       | 1         | 1         | 0.56       | 1       | 1      | 1           | 1        | 1      |
| NCB           | Fin.        | 0        | 0       | 0         | 0         | 0          | 0       | 0      | 0           | 0        | 0      |
|               | Obj.        | 1,158    | 340,160 | 56,137    | 26,374    | -2,451,350 | 188,182 | 568.10 | 106,940,000 | 4,722    | 1,120  |
|               | Nodes       | 115,987  | 0       | 365       | 487       | 20         | 8,135   | 7      | 9           | 187      | 223    |
|               | Time        | 2,043.61 | 0.59    | 3,488.17  | 1,844.01  | 0.87       | 33.28   | 0.02   | 0.46        | 4.74     | 0.22   |
|               | Cl. Gap     | 1        | 1       | 1         | 1         | 0.56       | 1       | 1      | 1           | 1        | 1      |
| FSB           | Fin.        | 0        | 0       | 0         | 0         | 0          | 0       | 0      | 0           | 0        | 0      |
|               | Obj.        | 1,158    | 340,160 | 56,137    | 26,374    | -2,451,180 | 188,186 | 568.10 | 106,940,000 | 4,722    | 1,120  |
|               | Nodes       | 31,323   | 0       | 231       | 211       | 49         | 40      | 7      | 5           | 169      | 133    |
|               | Time        | 1,158.81 | 0.60    | 10,229.90 | 3,941.68  | 1.53       | 0.77    | 0.02   | 0.42        | 18.73    | 0.27   |
|               | Cl. Gap     | 1        | 1       | 1         | 1         | 1.06       | 1       | 1      | 1           | 1        | 1      |
| RB            | Fin.        | 0        | 0       | 0         | 0         | 0          | 0       | 0      | 0           | 0        | 0      |
|               | Obj.        | 1,158    | 340,160 | 56,137    | 26,374    | -2,451,350 | 188,187 | 568.10 | 106,940,000 | 4,722    | 1,120  |
|               | Nodes       | 84,014   | 0       | 336,711   | 78,761    | 20         | 429     | 7      | 7           | 459      | 99     |
|               | Time        | 590.75   | 0.59    | 57,934.10 | 17,733.40 | 0.93       | 1.67    | 0.02   | 0.45        | 6.45     | 0.15   |
|               | Cl. Gap     | 1        | 1       | 1         | 1         | 0.56       | 1       | 1      | 1           | 1        | 1      |
| Learned       | Fin.        | 0        | 0       | 0         | 0         | 0          | 0       | 0      | 0           | 0        | 0      |
|               | Obj.        | 1,158    | 340,160 | 56,137    | 26,374    | -2,451,350 | 188,195 | 568.10 | 106,940,000 | 4,722    | 1,120  |
|               | Nodes       | 42,389   | 0       | 553       | 5,785     | 20         | 111     | 5      | 7           | 799      | 75     |
|               | Time        | 296.91   | 0.60    | 237.80    | 969.80    | 0.74       | 0.87    | 0.02   | 0.44        | 7.27     | 0.17   |
|               | Closed gap  | 1        | 1       | 1         | 1         | 0.56       | 1       | 1      | 1           | 1        | 1      |

The row 'Cl. Gap' refers to the gap closed at the end of the optimization whether it achieved optimality or not. The row 'Fin. by all' indicates whether all methods were able to solve this problem to optimality. For each method, the 'Fin.' rows indicate the termination status of the optimization: 0 for optimality, 1 for unfeasibility, 2 for unboundedness, 3 for unfeasibility or unboundedness, 4 for another stopping criterion with a feasible solution found, and 5 for another stopping criterion with no feasible solution found.

**Table 19 Detailed results for the updated list of MIPLIB problems (2/3). Time limit = none and CPLEX's cuts and heuristics applied.**

| Problem names |            | mas76     | misc03 | misc06    | misc07  | mitre   | mod008 | mod010   | mod011      | nw04      | p0033    |
|---------------|------------|-----------|--------|-----------|---------|---------|--------|----------|-------------|-----------|----------|
| LP Obj.       |            | 38,893.90 | 1,910  | 12,841.70 | 1,415   | 114,741 | 290.93 | 6,532.08 | -62,122,000 | 16,310.70 | 2,520.57 |
| True Obj.     |            | 40,005.10 | 3,360  | 12,850.90 | 2,810   | 115,155 | 307    | 6,548    | -54,558,500 | 16,862    | 3,089    |
| Fin. by all   |            | 1         | 1      | 1         | 1       | 1       | 1      | 1        | 1           | 1         | 1        |
| <b>Method</b> |            |           |        |           |         |         |        |          |             |           |          |
| Random        | Fin.       | 0         | 0      | 0         | 0       | 0       | 0      | 0        | 0           | 0         | 0        |
|               | Obj.       | 40,005.10 | 3,360  | 12,850.90 | 2,810   | 115,155 | 307    | 6,548    | -54,600,000 | 16,862    | 3,089    |
|               | Nodes      | 2,869,383 | 1,009  | 7         | 55,815  | 15      | 1,589  | 1,505    | 58,297      | 255       | 1        |
|               | Time       | 1,004.72  | 0.93   | 0.55      | 48.61   | 4.33    | 0.47   | 3.96     | 3,726.60    | 46.53     | 0.01     |
|               | Cl. Gap    | 1         | 1      | 1         | 1       | 1       | 1      | 1        | 0.99        | 1         | 1        |
| MIB           | Fin.       | 0         | 0      | 0         | 0       | 0       | 0      | 0        | 0           | 0         | 0        |
|               | Obj.       | 40,005.10 | 3,360  | 12,850.90 | 2,810   | 115,155 | 307    | 6,548    | -54,558,500 | 16,862    | 3,089    |
|               | Nodes      | 1,742,607 | 279    | 11        | 13,707  | 29      | 1,537  | 39       | 4,027       | 337       | 1        |
|               | Time       | 518.99    | 0.47   | 0.56      | 13.28   | 4.27    | 0.47   | 0.65     | 333.87      | 51.31     | 0.01     |
|               | Cl. Gap    | 1         | 1      | 1         | 1       | 1       | 1      | 1        | 1           | 1         | 1        |
| NCB           | Fin.       | 0         | 0      | 0         | 0       | 0       | 0      | 0        | 0           | 0         | 0        |
|               | Obj.       | 40,005.10 | 3,360  | 12,850.90 | 2,810   | 115,155 | 307    | 6,548    | -54,558,500 | 16,862    | 3,089    |
|               | Nodes      | 400,115   | 455    | 7         | 26,769  | 20      | 783    | 13       | 160,639     | 39        | 1        |
|               | Time       | 311.09    | 1.99   | 0.59      | 222.85  | 4.26    | 0.47   | 0.64     | 34,024.60   | 34.68     | 0.01     |
|               | Cl. Gap    | 1         | 1      | 1         | 1       | 1       | 1      | 1        | 1           | 1         | 1        |
| FSB           | Fin.       | 0         | 0      | 0         | 0       | 0       | 0      | 0        | 0           | 0         | 0        |
|               | Obj.       | 40,005.10 | 3,360  | 12,850.90 | 2,810   | 115,155 | 307    | 6,548    | -54,558,500 | 16,862    | 3,089    |
|               | Nodes      | 355,507   | 301    | 7         | 17,299  | 20      | 423    | 11       | 19,789      | 55        | 1        |
|               | Time       | 394.68    | 3.60   | 0.61      | 410.78  | 4.44    | 0.52   | 0.91     | 6,564.28    | 47.72     | 0.01     |
|               | Cl. Gap    | 1         | 1      | 1         | 1       | 1       | 1      | 1        | 1           | 1         | 1        |
| RB            | Fin.       | 0         | 0      | 0         | 0       | 0       | 0      | 0        | 0           | 0         | 0        |
|               | Obj.       | 40,005.10 | 3,360  | 12,850.90 | 2,810   | 115,155 | 307    | 6,548    | -54,558,500 | 16,862    | 3,089    |
|               | Nodes      | 561,667   | 305    | 9         | 19,231  | 15      | 1,755  | 115      | 64,870      | 1,213     | 1        |
|               | Time       | 188.54    | 1.02   | 0.61      | 61.48   | 4.30    | 0.78   | 1.24     | 7,436.06    | 143.11    | 0.01     |
|               | Cl. Gap    | 1         | 1      | 1         | 1       | 1       | 1      | 1        | 1           | 1         | 1        |
| Learned       | Fin.       | 0         | 0      | 0         | 0       | 0       | 0      | 0        | 0           | 0         | 0        |
|               | Obj.       | 40,005.10 | 3,360  | 12,850.90 | 2,810   | 115,155 | 307    | 6,548    | -54,558,500 | 16,862    | 3,089    |
|               | Nodes      | 564,679   | 1,979  | 9         | 110,751 | 10      | 993    | 99       | 5,064       | 55        | 1        |
|               | Time       | 307.45    | 3.43   | 0.56      | 212.24  | 4.05    | 0.67   | 1.03     | 541.92      | 34.02     | 0.01     |
|               | Closed gap | 1         | 1      | 1         | 1       | 1       | 1      | 1        | 1           | 1         | 1        |

The row 'Cl. Gap' refers to the gap closed at the end of the optimization whether it achieved optimality or not. The row 'Fin. by all' indicates whether all methods were able to solve this problem to optimality. For each method, the 'Fin.' rows indicate the termination status of the optimization: 0 for optimality, 1 for unfeasibility, 2 for unboundedness, 3 for unfeasibility or unboundedness, 4 for another stopping criterion with a feasible solution found, and 5 for another stopping criterion with no feasible solution found.

**Table 20 Detailed results for the updated list of MIPLIB problems (3/3). Time limit = none and CPLEX's cuts and heuristics applied.**

| Problem names |       | p0201 | pk1     | pp08aCUTS | qiu      | rentacar   | rgn   | stein27 | stein45 | vpm1  | vpm2   |
|---------------|-------|-------|---------|-----------|----------|------------|-------|---------|---------|-------|--------|
| LP Obj.       |       | 6,875 | 0       | 5,480.61  | -931.64  | 28,806,100 | 48.80 | 13      | 22      | 15.42 | 9.89   |
| True Obj.     |       | 7,615 | 11      | 7,350     | -132.87  | 30,356,800 | 82.20 | 18      | 30      | 20    | 13.75  |
| Fin. by all   |       | 1     | 1       | 1         | 1        | 1          | 1     | 1       | 1       | 1     | 1      |
| Method        |       |       |         |           |          |            |       |         |         |       |        |
| Random        | Fin.  | 0     | 0       | 0         | 0        | 0          | 0     | 0       | 0       | 0     | 0      |
|               | Obj.  | 7,615 | 11      | 7,350     | -132.87  | 30,400,000 | 82.20 | 18      | 30      | 20    | 13.75  |
|               | Nodes | 40    | 861,991 | 4,965     | 462,433  | 9          | 2,605 | 4,499   | 61,825  | 0     | 5,869  |
|               | Time  | 0.73  | 265     | 8.08      | 3,565.69 | 12.75      | 0.60  | 0.78    | 22.17   | 0.02  | 4.95   |
| Cl. Gap       |       | 1     | 1       | 1         | 1        | 1.03       | 1     | 1       | 1       | 1     | 1      |
| MIB           | Fin.  | 0     | 0       | 0         | 0        | 0          | 0     | 0       | 0       | 0     | 0      |
|               | Obj.  | 7,615 | 11      | 7,350     | -132.87  | 30,356,800 | 82.20 | 18      | 30      | 20    | 13.75  |
|               | Nodes | 57    | 892,187 | 5,157     | 265,859  | 7          | 2,233 | 4,633   | 82,377  | 0     | 5,721  |
|               | Time  | 0.83  | 272.01  | 7.98      | 1,999.22 | 12.93      | 0.51  | 0.80    | 27.61   | 0.01  | 5.15   |
| Cl. Gap       |       | 1     | 1       | 1         | 1        | 1          | 1     | 1       | 1       | 1     | 1      |
| NCB           | Fin.  | 0     | 0       | 0         | 0        | 0          | 0     | 0       | 0       | 0     | 0      |
|               | Obj.  | 7,615 | 11      | 7,350     | -132.87  | 30,356,800 | 82.20 | 18      | 30      | 20    | 13.75  |
|               | Nodes | 67    | 243,581 | 12,497    | 12,541   | 7          | 3,007 | 3,499   | 39,787  | 0     | 5,781  |
|               | Time  | 1.31  | 430.17  | 68.16     | 913.26   | 14.27      | 1.80  | 1.79    | 90.07   | 0.01  | 14.19  |
| Cl. Gap       |       | 1     | 1       | 1         | 1        | 1          | 1     | 1       | 1       | 1     | 1      |
| FSB           | Fin.  | 0     | 0       | 0         | 0        | 0          | 0     | 0       | 0       | 0     | 0      |
|               | Obj.  | 7,615 | 11      | 7,350     | -132.87  | 30,356,800 | 82.20 | 18      | 30      | 20    | 13.75  |
|               | Nodes | 67    | 284,851 | 7,523     | 27,779   | 7          | 1,489 | 2,153   | 24,949  | 0     | 3,847  |
|               | Time  | 2.60  | 651.97  | 70.38     | 3,074.14 | 14.23      | 0.82  | 3.46    | 244.19  | 0.02  | 18.59  |
| Cl. Gap       |       | 1     | 1       | 1         | 1        | 1          | 1     | 1       | 1       | 1     | 1      |
| RB            | Fin.  | 0     | 0       | 0         | 0        | 0          | 0     | 0       | 0       | 0     | 0      |
|               | Obj.  | 7,615 | 11      | 7,350     | -132.87  | 30,356,800 | 82.20 | 18      | 30      | 20    | 13.75  |
|               | Nodes | 113   | 308,491 | 9,515     | 26,277   | 11         | 2,271 | 4,231   | 53,623  | 0     | 3,197  |
|               | Time  | 1.13  | 153.21  | 22.80     | 745.02   | 14.98      | 0.83  | 1.58    | 58.58   | 0.01  | 4.18   |
| Cl. Gap       |       | 1     | 1       | 1         | 1        | 1          | 1     | 1       | 1       | 1     | 1      |
| Learned       | Fin.  | 0     | 0       | 0         | 0        | 0          | 0     | 0       | 0       | 0     | 0      |
|               | Obj.  | 7,615 | 11      | 7,350     | -132.87  | 30,356,800 | 82.20 | 18      | 30      | 20    | 13.75  |
|               | Nodes | 43    | 897,129 | 3,131     | 25,065   | 7          | 1,619 | 4,449   | 54,541  | 0     | 10,207 |
|               | Time  | 0.88  | 651.99  | 8.18      | 363.04   | 13.03      | 0.65  | 2.78    | 69.59   | 0.01  | 18.03  |
| Closed gap    |       | 1     | 1       | 1         | 1        | 1          | 1     | 1       | 1       | 1     | 1      |

The row 'Cl. Gap' refers to the gap closed at the end of the optimization whether it achieved optimality or not. The row 'Fin. by all' indicates whether all methods were able to solve this problem to optimality. For each method, the 'Fin.' rows indicate the termination status of the optimization: 0 for optimality, 1 for unfeasibility, 2 for unboundedness, 3 for unfeasibility or unboundedness, 4 for another stopping criterion with a feasible solution found, and 5 for another stopping criterion with no feasible solution found.

## References

Geurts, P., D. Ernst, L. Wehenkel. 2006. Extremely randomized trees. *Machine learning* **63** 3–42.
